# Supplementary material for: Expression Profiling Analysis Reveals Key MicroRNA–mRNA Interactions in Early Retinal Degeneration in Retinitis Pigmentosa
Source: PubMed Central journal article supplement (PMC5939684; doi:10.1167/iovs.18-24091), 2018-05
Supplement: iovs-59-05-36_s01.pdf [file iovs-59-05-36_s01.pdf]

## Supporting information

### **Expression profiling analysis reveals key microRNA-mRNA interactions in early retinal degeneration in retinitis pigmentosa.**

Ander Anasagasti<sup>1</sup>; Maitane Ezquerro-Inchausti<sup>1,2</sup>; Olatz Barandika<sup>1</sup>; Maider Muñoz-Culla<sup>3,4</sup>; María M. Caffarel<sup>5,6</sup>; David Otaegui<sup>3,4</sup>; Adolfo López de Munain<sup>1,7,8,9</sup>; Javier Ruiz-Ederra<sup>\*1,2</sup>.

<sup>1</sup>Neuroscience Area, Sensorial Neurodegeneration Group, Biodonostia Health Research Institute, San Sebastian, Spain; <sup>2</sup>RETICS OFTARED, National Institute of Health Carlos III, Ministry of Economy and Competitiveness, Spain; <sup>3</sup>Neuroscience Area, Multiple Sclerosis Group, Biodonostia Health Research Institute, San Sebastian, Spain; <sup>4</sup>REEM: Spanish network on Multiple Sclerosis (Red Española de Esclerosis Múltiple); <sup>5</sup>Oncology Area, Biodonostia Health Research Institute, San Sebastian, Spain; <sup>6</sup>Ikerbasque, Basque Foundation for Science, Bilbao, Spain; <sup>7</sup>Department of Neurology, Donostia University Hospital, San Sebastian, Spain; <sup>8</sup>CIBERNED, Centro de Investigaciones Biomédicas en Red sobre Enfermedades Neurodegenerativas, Instituto Carlos III, Ministerio de Economía y Competitividad, Spain; <sup>9</sup>Department of Neuroscience, University of the Basque Country, San Sebastian, Spain

\*Corresponding author.

E-mail: javiruizederra@yahoo.es/javier.ruizederra@osakideteta.net (JR)

**Supplementary Fig S1. Workflow summarizing the approach used to identify candidate miRNAs and mRNAs possibly involved in retinal degeneration of rd10 mice.**

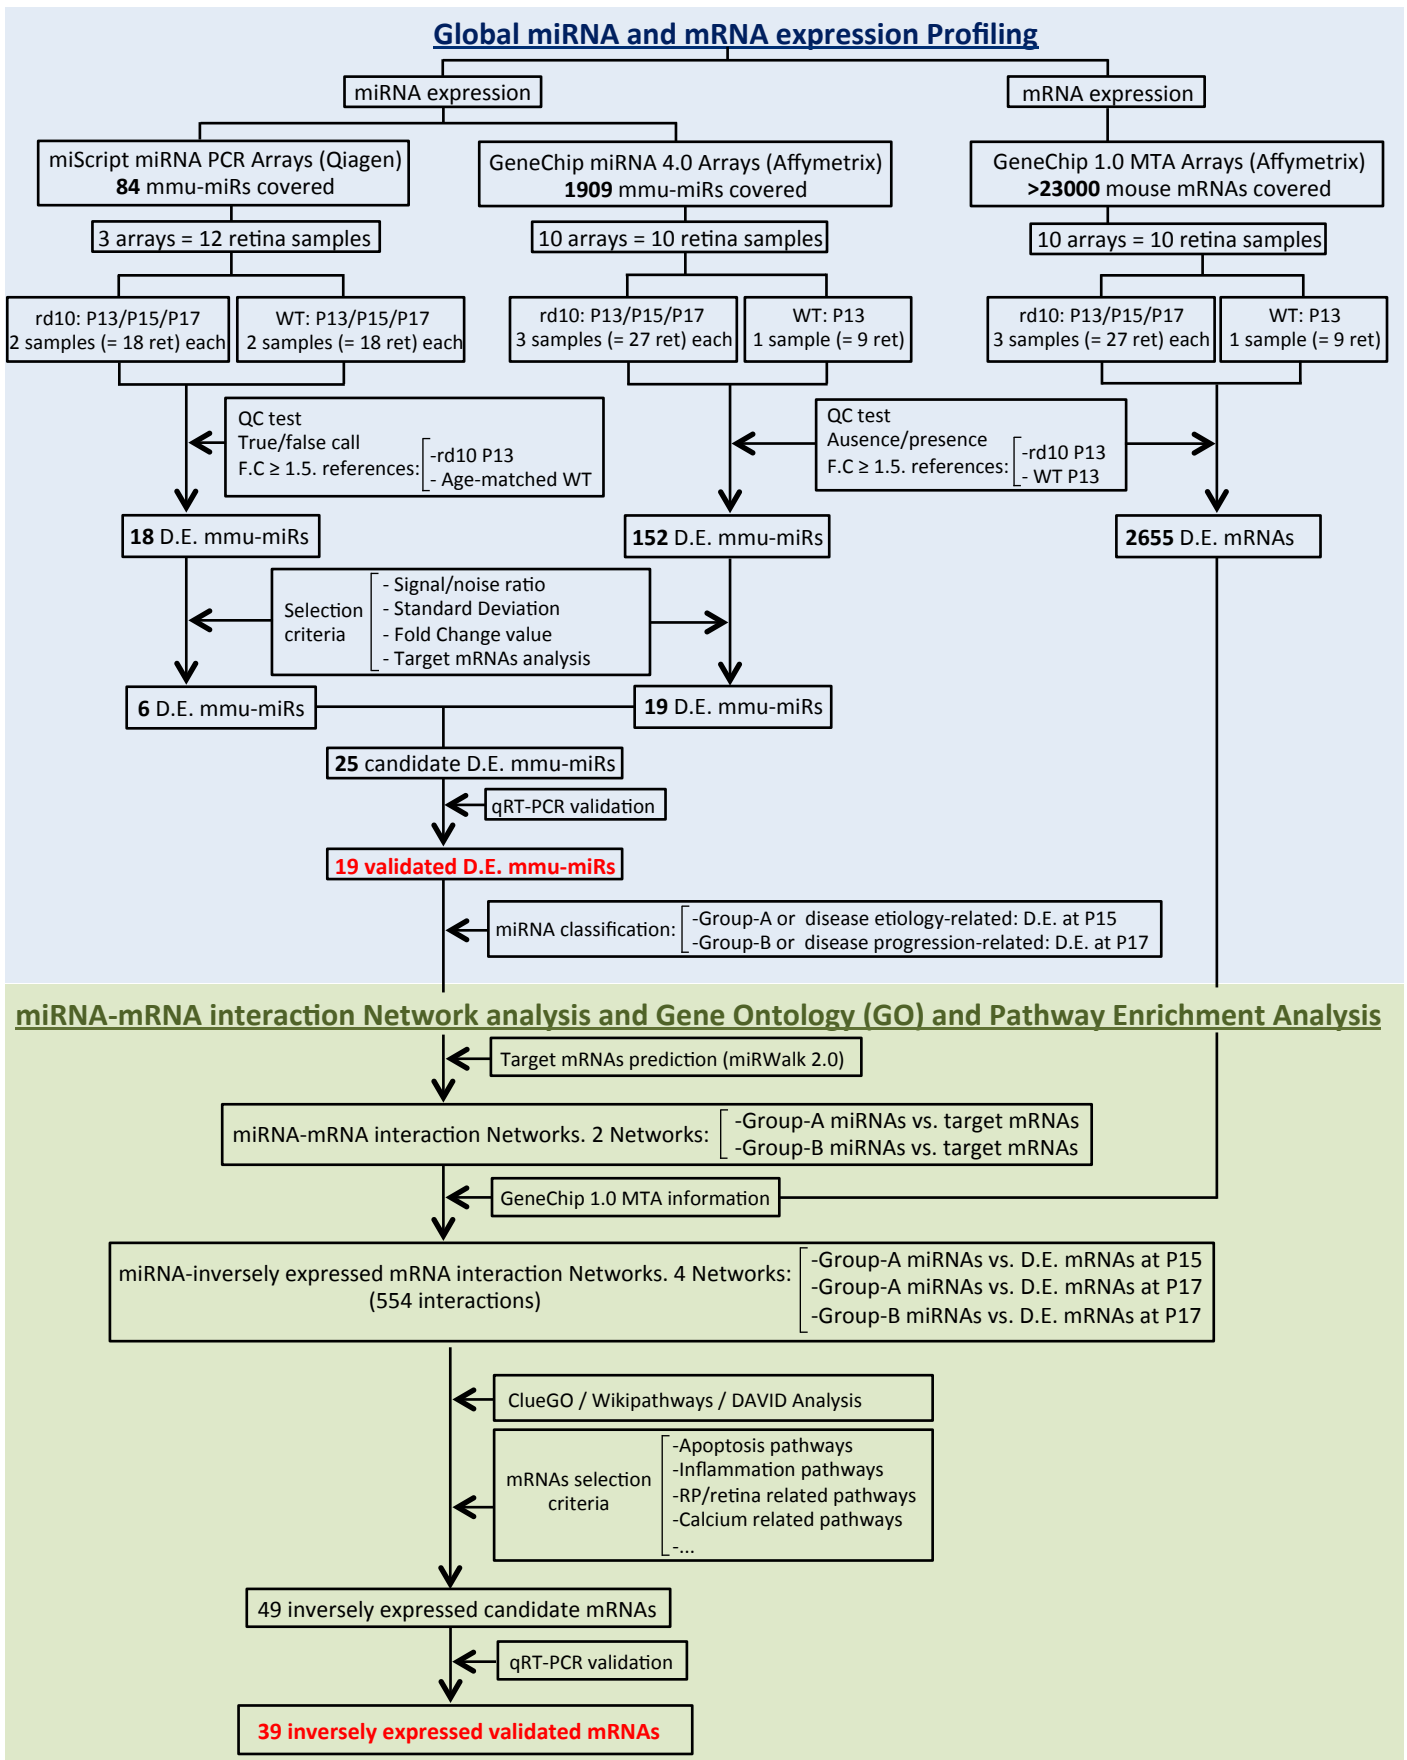

**Supplementary Fig S1. Workflow summarizing the approach used to identify candidate miRNAs and mRNAs possibly involved in retinal degeneration of rd10 mice.**

Blue square summarizes global miRNA and mRNA expression profiling workflow to identify candidate miRNAs in which we used 2 miRNA profiling and one mRNA profiling systems. Green square summarizes miRNA-mRNA interaction network analysis generated with CytoScape software and Gene Ontology and Pathway Enrichment Analysis to identify mRNAs possibly involved in retinal degeneration of rd10 mice using ClueGO app and WikiPathways and DAVID databases. Abbreviations: DE differentially expressed; F.C.: fold-change; mmu-miRNA: *Mus musculus* microRNA; MTA: mouse transcriptome array; P13/15/17: postnatal days 13/15/17; qRT-PCR: quantitative reverse transcription polymerase chain reaction Q.C: quality control; SD: standard deviation.

**Supplementary Table S1:** Differentially expressed miRNAs. (F.C.> 1.5 and p value <0.05) detected by the GeneChip miRNA 4.0 arrays. In bold those values that meet these criteria.

**Supplementary Table S2:** Differentially expressed miRNAs (F.C.> 1.5) detected by the miScript miRNA PCR arrays. In bold those values that meet these criteria.

**Supplementary Table S1: Differentially expressed miRNAs detected by the GeneChip miRNA 4.0 arrays.**

| <b>Transcript ID</b> | <b>p15 vs. p13</b> | <b>p-value</b> | <b>p17 vs. p13</b> | <b>p-value</b> |
|----------------------|--------------------|----------------|--------------------|----------------|
| mmu-miR-7002-5p      | 4,95               | 0,0076         | 33,58              | 1,54E-07       |
| mmu-miR-6937-5p      | 4,33               | 0,0031         | 20,40              | 0,0001         |
| mmu-miR-7221-3p      | 1,68               | 0,1935         | 6,94               | 0,0021         |
| mmu-miR-6970-5p      | 1,56               | 0,0099         | 6,47               | 0,0002         |
| mmu-miR-6240         | 1,50               | 0,2283         | 6,21               | 0,0001         |
| mmu-miR-7035-5p      | 1,16               | 0,8146         | 6,16               | 0,0183         |
| mmu-miR-3473e        | 1,13               | 0,4942         | 5,73               | 0,0001         |
| mmu-miR-3473b        | 1,16               | 0,3833         | 5,58               | 0,0001         |
| mmu-miR-7036b-3p     | 1,14               | 0,4144         | 5,39               | 0,0002         |
| mmu-miR-7648-3p      | 1,10               | 0,5639         | 4,63               | 1,11E-05       |
| mmu-miR-1934-3p      | 1,49               | 0,2549         | 4,54               | 0,0041         |
| mmu-miR-6968-5p      | 1,17               | 0,3451         | 4,43               | 3,39E-05       |
| mmu-miR-7036-5p      | 1,42               | 0,1709         | 4,41               | 0,0010         |
| mmu-miR-3620-5p      | 1,27               | 0,2966         | 4,41               | 0,0013         |
| mmu-miR-7081-5p      | 1,32               | 0,1995         | 4,25               | 0,0004         |
| mmu-miR-3090-5p      | 1,42               | 0,2509         | 4,18               | 0,0006         |
| mmu-miR-3547-5p      | 1,21               | 0,2958         | 3,97               | 4,54E-05       |
| mmu-miR-346-3p       | 1,26               | 0,3833         | 3,95               | 0,0014         |
| mmu-miR-7115-5p      | 1,65               | 0,0298         | 3,84               | 0,0038         |
| mmu-miR-714          | -1,14              | 0,4126         | 3,78               | 0,0002         |
| mmu-miR-3473a        | 1,15               | 0,4477         | 3,54               | 0,0001         |
| mmu-miR-762          | 1,08               | 0,5752         | 3,48               | 0,0007         |
| mmu-miR-7686-5p      | 1,13               | 0,7945         | 3,42               | 0,0459         |
| mmu-miR-6910-5p      | -1,14              | 0,5114         | 3,36               | 0,0006         |
| mmu-miR-187-5p       | 3,06               | 0,0317         | 3,36               | 0,0226         |
| mmu-miR-2137         | -1,10              | 0,4606         | 3,29               | 0,0003         |
| mmu-miR-7009-5p      | 1,57               | 0,3318         | 3,25               | 0,0436         |
| mmu-mir-3473a        | 1,04               | 0,8052         | 3,12               | 0,0097         |
| mmu-miR-7047-5p      | 1,27               | 0,0405         | 3,08               | 2,89E-05       |
| mmu-miR-7658-5p      | 1,41               | 0,1639         | 3,03               | 0,0005         |
| mmu-miR-5122         | -1,05              | 0,8694         | 2,92               | 0,0085         |
| mmu-miR-92a-2-5p     | -1,05              | 0,8881         | 2,88               | 0,0007         |
| mmu-miR-8102         | -1,33              | 0,4832         | 2,67               | 0,0263         |
| mmu-miR-5126         | 1,22               | 0,1290         | 2,66               | 0,0001         |
| mmu-miR-5130         | 1,19               | 0,3204         | 2,62               | 0,0014         |
| mmu-miR-3473f        | 1,47               | 0,2324         | 2,58               | 0,0156         |
| mmu-miR-149-3p       | 1,17               | 0,3606         | 2,56               | 0,0001         |
| mmu-miR-7023-5p      | 1,29               | 0,2788         | 2,55               | 0,0055         |
| mmu-miR-6366         | -1,18              | 0,3130         | 2,50               | 0,0020         |
| mmu-miR-2861         | 1,22               | 0,2787         | 2,48               | 0,0015         |
| mmu-miR-3102-5p      | -1,08              | 0,7947         | 2,37               | 0,0089         |
| mmu-miR-5128         | 1,10               | 0,6094         | 2,33               | 0,0050         |
| mmu-miR-6944-5p      | 1,29               | 0,1685         | 2,32               | 0,0035         |
| mmu-miR-3077-5p      | 1,17               | 0,3752         | 2,32               | 0,0022         |

|                   |       |        |       |        |
|-------------------|-------|--------|-------|--------|
| mmu-miR-6909-5p   | -1,07 | 0,5798 | 2,22  | 0,0029 |
| mmu-miR-7069-5p   | 1,09  | 0,7143 | 2,19  | 0,0071 |
| mmu-miR-6931-5p   | 1,23  | 0,2101 | 2,15  | 0,0052 |
| mmu-miR-29a-3p    | 1,51  | 0,1741 | 2,11  | 0,0420 |
| mmu-miR-6914-5p   | 1,48  | 0,0603 | 2,02  | 0,0098 |
| mmu-mir-2861      | 1,10  | 0,2307 | 1,98  | 0,0003 |
| mmu-miR-7085-5p   | -1,12 | 0,6279 | 1,97  | 0,0036 |
| mmu-miR-6394      | 1,18  | 0,2694 | 1,90  | 0,0120 |
| mmu-miR-146a-5p   | -1,14 | 0,5813 | 1,83  | 0,0387 |
| mmu-miR-6956-5p   | 1,29  | 0,3086 | 1,83  | 0,0377 |
| mmu-miR-150-3p    | 1,52  | 0,0415 | 1,81  | 0,0108 |
| mmu-miR-6980-5p   | 1,04  | 0,8000 | 1,76  | 0,0396 |
| mmu-miR-92b-5p    | 1,05  | 0,7156 | 1,76  | 0,0137 |
| mmu-miR-6769b-5p  | 1,06  | 0,6857 | 1,70  | 0,0037 |
| mmu-miR-3572-5p   | 1,11  | 0,2539 | 1,66  | 0,0140 |
| mmu-miR-3960      | 1,14  | 0,2307 | 1,65  | 0,0027 |
| mmu-miR-8101      | 1,00  | 0,9812 | 1,64  | 0,0038 |
| mmu-miR-5132-5p   | 1,52  | 0,0119 | 1,60  | 0,0062 |
| mmu-mir-3960      | -1,10 | 0,1490 | 1,55  | 0,0006 |
| mmu-mir-2137      | -1,06 | 0,6307 | 1,51  | 0,0406 |
| mmu-miR-3102-3p   | 1,58  | 0,0395 | 1,50  | 0,0544 |
| mmu-miR-664-5p    | 1,91  | 0,0073 | 1,41  | 0,1123 |
| mmu-miR-7682-3p   | 1,55  | 0,0099 | 1,37  | 0,0305 |
| mmu-miR-193b-5p   | 1,77  | 0,0362 | 1,07  | 0,7644 |
| mmu-miR-135a-1-3p | -1,86 | 0,0228 | -1,42 | 0,0180 |
| mmu-mir-25        | -1,15 | 0,1076 | -1,52 | 0,0116 |
| mmu-miR-671-3p    | 1,17  | 0,2058 | -1,53 | 0,0063 |
| mmu-mir-677       | -1,23 | 0,2669 | -1,54 | 0,0125 |
| mmu-miR-431-5p    | -1,03 | 0,8297 | -1,54 | 0,0136 |
| mmu-miR-181c-5p   | -1,18 | 0,2795 | -1,54 | 0,0345 |
| mmu-miR-199a-3p   | -1,92 | 0,0501 | -1,55 | 0,0346 |
| mmu-miR-199b-3p   | -1,92 | 0,0501 | -1,55 | 0,0346 |
| mmu-miR-181d-5p   | -1,09 | 0,4286 | -1,55 | 0,0038 |
| mmu-miR-28a-3p    | -1,28 | 0,0944 | -1,55 | 0,0199 |
| mmu-miR-494-3p    | -1,20 | 0,1809 | -1,56 | 0,0066 |
| mmu-miR-9-3p      | -1,26 | 0,1758 | -1,57 | 0,0323 |
| mmu-mir-6984      | -1,19 | 0,2306 | -1,58 | 0,0219 |
| mmu-mir-183       | -1,10 | 0,2229 | -1,58 | 0,0015 |
| mmu-miR-7a-2-3p   | -1,11 | 0,3220 | -1,59 | 0,0026 |
| mmu-miR-669a-5p   | -1,13 | 0,5404 | -1,60 | 0,0327 |
| mmu-miR-669p-5p   | -1,13 | 0,5404 | -1,60 | 0,0327 |
| mmu-miR-505-5p    | 1,01  | 0,9363 | -1,61 | 0,0097 |
| mmu-miR-378a-3p   | -1,03 | 0,7194 | -1,62 | 0,0022 |
| mmu-miR-423-3p    | 1,05  | 0,6603 | -1,62 | 0,0214 |
| mmu-miR-181a-2-3p | -1,21 | 0,0375 | -1,64 | 0,0099 |
| mmu-miR-532-3p    | 1,03  | 0,8243 | -1,64 | 0,0108 |
| mmu-miR-6965-5p   | -1,05 | 0,7486 | -1,64 | 0,0346 |
| mmu-miR-672-5p    | -1,20 | 0,0431 | -1,65 | 0,0010 |
| mmu-miR-378a-5p   | 1,03  | 0,6635 | -1,65 | 0,0039 |

|                   |       |        |       |          |
|-------------------|-------|--------|-------|----------|
| mmu-miR-17-3p     | -1,04 | 0,7322 | -1,65 | 0,0058   |
| mmu-miR-217-5p    | -1,16 | 0,1777 | -1,66 | 0,0041   |
| mmu-miR-6239      | -1,33 | 0,1141 | -1,67 | 0,0492   |
| mmu-miR-676-3p    | -1,16 | 0,0104 | -1,68 | 0,0001   |
| mmu-miR-183-3p    | -1,16 | 0,1310 | -1,68 | 0,0011   |
| mmu-miR-5121      | -1,21 | 0,0471 | -1,68 | 0,0012   |
| mmu-miR-34c-3p    | -1,19 | 0,3408 | -1,69 | 0,0248   |
| mmu-miR-325-5p    | -1,04 | 0,6819 | -1,70 | 0,0002   |
| mmu-miR-378c      | -1,07 | 0,0664 | -1,71 | 3,58E-05 |
| mmu-miR-7a-1-3p   | -1,38 | 0,1176 | -1,71 | 0,0269   |
| mmu-miR-484       | -1,07 | 0,4473 | -1,73 | 0,0063   |
| mmu-miR-130b-3p   | -1,13 | 0,1359 | -1,73 | 0,0007   |
| mmu-miR-30b-3p    | -1,01 | 0,8906 | -1,74 | 0,0008   |
| mmu-miR-28a-5p    | -1,15 | 0,1140 | -1,75 | 0,0008   |
| mmu-miR-378b      | -1,11 | 0,1579 | -1,75 | 0,0005   |
| mmu-miR-378d      | -1,09 | 0,1544 | -1,81 | 0,0007   |
| mmu-miR-124-5p    | -1,12 | 0,3249 | -1,81 | 0,0046   |
| mmu-miR-181a-1-3p | -1,22 | 0,1793 | -1,81 | 0,0461   |
| mmu-mir-93        | -1,11 | 0,2630 | -1,81 | 0,0013   |
| mmu-miR-30e-3p    | -1,26 | 0,3502 | -1,83 | 0,0195   |
| mmu-miR-181c-3p   | -1,09 | 0,5378 | -1,84 | 0,0143   |
| mmu-miR-6540-5p   | -1,10 | 0,2450 | -1,85 | 0,0016   |
| mmu-miR-7007-5p   | -1,10 | 0,5994 | -1,86 | 0,0221   |
| mmu-miR-3962      | -1,68 | 0,0658 | -1,88 | 0,0119   |
| mmu-miR-467a-5p   | -1,22 | 0,2160 | -1,89 | 0,0048   |
| mmu-miR-106b-3p   | -1,10 | 0,3212 | -1,91 | 0,0005   |
| mmu-miR-34b-3p    | -1,09 | 0,4136 | -1,92 | 0,0014   |
| mmu-miR-677-3p    | -1,21 | 0,1801 | -1,93 | 0,0045   |
| mmu-miR-15a-5p    | -1,21 | 0,4621 | -1,96 | 0,0447   |
| mmu-miR-350-3p    | -1,37 | 0,1239 | -1,96 | 0,0292   |
| mmu-mir-1224      | -1,12 | 0,4767 | -1,97 | 0,0044   |
| mmu-miR-3095-3p   | -1,15 | 0,4495 | -1,97 | 0,0381   |
| mmu-miR-3078-5p   | -1,22 | 0,0064 | -2,00 | 2,29E-05 |
| mmu-miR-15b-5p    | -1,37 | 0,0533 | -2,01 | 0,0018   |
| mmu-miR-6984-5p   | -1,15 | 0,4337 | -2,02 | 0,0150   |
| mmu-miR-106b-5p   | -1,25 | 0,0551 | -2,03 | 0,0001   |
| mmu-miR-216b-5p   | -1,46 | 0,0848 | -2,04 | 0,0393   |
| mmu-miR-351-5p    | -1,36 | 0,0297 | -2,05 | 0,0025   |
| mmu-miR-503-5p    | -3,06 | 0,0007 | -2,07 | 0,0116   |
| mmu-miR-92a-3p    | -1,17 | 0,0382 | -2,11 | 4,51E-06 |
| mmu-miR-216a-5p   | -1,09 | 0,4863 | -2,16 | 0,0006   |
| mmu-miR-17-5p     | -1,38 | 0,0005 | -2,17 | 2,48E-05 |
| mmu-miR-296-3p    | -1,16 | 0,2023 | -2,18 | 0,0007   |
| mmu-miR-93-3p     | -1,29 | 0,1169 | -2,19 | 0,0010   |
| mmu-miR-20a-5p    | -1,47 | 0,0006 | -2,20 | 1,35E-05 |
| mmu-miR-25-3p     | -1,35 | 0,0791 | -2,22 | 0,0044   |
| mmu-miR-106a-5p   | -1,50 | 0,0227 | -2,22 | 0,0120   |
| mmu-miR-449a-5p   | -1,62 | 0,1199 | -2,23 | 0,0353   |
| mmu-miR-93-5p     | -1,35 | 0,0253 | -2,25 | 0,0004   |

|                   |       |        |       |        |
|-------------------|-------|--------|-------|--------|
| mmu-miR-466a-3p   | -1,65 | 0,1290 | -2,38 | 0,0232 |
| mmu-miR-466e-3p   | -1,65 | 0,1290 | -2,38 | 0,0232 |
| mmu-miR-96-3p     | -1,33 | 0,3054 | -2,39 | 0,0262 |
| mmu-miR-19b-3p    | -1,48 | 0,0776 | -2,51 | 0,0043 |
| mmu-miR-20b-5p    | -1,85 | 0,0151 | -2,55 | 0,0018 |
| mmu-miR-3074-1-3p | -1,15 | 0,5406 | -2,81 | 0,0040 |
| mmu-miR-18a-5p    | -1,39 | 0,3300 | -3,05 | 0,0145 |
| mmu-miR-218-5p    | -1,30 | 0,3910 | -3,24 | 0,0103 |
| mmu-miR-182-3p    | -1,40 | 0,0596 | -3,42 | 0,0019 |

**Supplementary Table S2: Differentially expressed miRNAs detected by the miScript miRNA PCR arrays.**

| <b>ID</b>       | <b>p15</b> | <b>p17</b> |
|-----------------|------------|------------|
| mmu-miR-29a-3p  | 1,81       | 2,94       |
| mmu-miR-146a-5p | 1,15       | 2,5        |
| mmu-miR-29b-3p  | -1,14      | 1,91       |
| mmu-miR-155-5p  | 1,19       | 1,77       |
| mmu-miR-142a-5p | 2,09       | 1,62       |
| mmu-miR-1a-3p   | -1,66      | 1,58       |
| mmu-miR-22-3p   | 1,44       | 1,58       |
| mmu-miR-17-5p   | 1,64       | 1,24       |
| mmu-miR-96-5p   | 1,97       | 1,23       |
| mmu-miR-101a-3p | 1,68       | 1,2        |
| mmu-miR-20a-5p  | 1,52       | 1,17       |
| mmu-miR-18a-5p  | 2,01       | -1,06      |
| mmu-let-7b-5p   | -1,66      | -1,07      |
| mmu-miR-19b-3p  | 1,67       | -1,18      |
| mmu-let-7c-5p   | -1,85      | -1,26      |
| mmu-miR-183-5p  | -1,29      | -1,55      |
| mmu-miR-92a-3p  | 1,24       | -1,65      |
